# Supplementary material for: Spatial distribution, work patterns, and perception towards malaria interventions among temporary mobile/migrant workers in artemisinin resistance containment zone
Source: PubMed Central journal article supplement (PMC4032392; doi:10.1186/1471-2458-14-463), 2014-05-17
Supplement: 1471-2458-14-463-S2.pdf [file 1471-2458-14-463-S2.pdf]

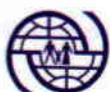

**Migrant Mapping – Malaria  
MARC Project - Mon State**

MARC Tool no.1

Township - ..... Village Tract - .....

Name of RHC..... Name of sub-RHC.....

Place of mapping (Tick only one)- A Village / Ward -  A Cluster outside the village /ward-

| Place Name | GPS coding of the place |          |         |
|------------|-------------------------|----------|---------|
| .....      | Place.....              | EO ..... | N ..... |

**1. Select the type of cluster / settlement as per definition provided. (Applicable only to a cluster)**

| 1.1. Large cluster? <input type="checkbox"/>                                                                                                                                                            | 1.2. Small cluster? <input type="checkbox"/>                                                                                                                                                                           | 1.3. Cut-off village settlement? <input type="checkbox"/>                                                                                                                                            |
|---------------------------------------------------------------------------------------------------------------------------------------------------------------------------------------------------------|------------------------------------------------------------------------------------------------------------------------------------------------------------------------------------------------------------------------|------------------------------------------------------------------------------------------------------------------------------------------------------------------------------------------------------|
| <ul style="list-style-type: none"> <li>• = &amp; &gt;60 people</li> <li>• Far away from villages</li> <li>• Homogenous in occupation</li> <li>• Rubber plantation, Mine, Palm oil plantation</li> </ul> | <ul style="list-style-type: none"> <li>• &lt; 60 people (25)</li> <li>• Need not to be close to village</li> <li>• Close to place of economic action</li> <li>• Construction sites (Buildings, Dams, Roads)</li> </ul> | <ul style="list-style-type: none"> <li>• Close to village</li> <li>• Share same resources with village</li> <li>• Economically dependent on village</li> <li>• Pond construction, Farming</li> </ul> |

**2. Migration in details (Applicable only to cluster / settlement)**

|                                                                                                                                                                                             |
|---------------------------------------------------------------------------------------------------------------------------------------------------------------------------------------------|
| 2.1. Pattern of migration (select one) Is it a temporary place? <input type="checkbox"/> Is it a permanent place? <input type="checkbox"/>                                                  |
| 2.2. Source - the place from where most of people of this cluster moved in-<br>a) .....State/Division.....Township.....village/ward<br>b) .....State/Division.....Township.....village/ward |
| 2.3. How long has this cluster been here? .....months .....years                                                                                                                            |
| 2.4. How long will this cluster be here? (For a temporary cluster) .....months .....years                                                                                                   |
| 2.5. Where does this cluster intent to move to a newer place? (only For a temporary cluster)<br>.....State/Division.....Township.....village/ward                                           |

**3. Occupation details**

**4. Language for communication**

| Common occupation | Common working hours |    |
|-------------------|----------------------|----|
|                   | From                 | To |
| 3.1               |                      |    |
| 3.2               |                      |    |

| Language          | Ability  |         |
|-------------------|----------|---------|
|                   | Speaking | Reading |
| 4.1 Myanmar       |          |         |
| 4.2 Other (.....) |          |         |

**5. Total population .....**

**6. No. of Forest dwellers**

| Age Group            | Permanent (Village) |   | Migrant/Mobile (Village / Cluster / Cut off Village settlement) |   |
|----------------------|---------------------|---|-----------------------------------------------------------------|---|
|                      | M                   | F | M                                                               | F |
| 5.1 Under 5 years    |                     |   |                                                                 |   |
| 5.2 5 to 14 years    |                     |   |                                                                 |   |
| 5.3 15 years & above |                     |   |                                                                 |   |
| Total                |                     |   |                                                                 |   |

|                                                                          |
|--------------------------------------------------------------------------|
| Estimated no. of people working at night time in forest (Forest dweller) |
| .....                                                                    |

**7. Households details (Village / Cluster / Settlement)**

| 7.1. No. of houses | 7.2. No. of households |
|--------------------|------------------------|
|                    |                        |

**8. Accessibility and availability of health facility and services close to this location**

8.1. Which is the nearest public health facility (Tick only one) Sub-RHC  RHC  Station hospital  Township hospital   
 Name of that health facility.....

**8.2. Means of accessibility to the above mentioned public health facility (Answer all if applicable)**

| Type of transport | Duration |        | Estimated cost (One way) | Is there any seasonal barrier? |    |
|-------------------|----------|--------|--------------------------|--------------------------------|----|
|                   | Hours    | Minute |                          | Yes                            | No |
| 1. By car         |          |        |                          |                                |    |
| 2. By motor bike  |          |        |                          |                                |    |
| 3. By bicycle     |          |        |                          |                                |    |
| 4. By foot        |          |        |                          |                                |    |
| 5. By boat        |          |        |                          |                                |    |

**8.3. Place and category of any malaria service provider for this location.**

a) Tick the most appropriate

AMW  TTBA  Village Practitioner  Pharmacy  Malaria Volunteer  Dr.  Other

b) Provide more information about the service provider

Name..... Job category.....

Name..... Job category.....

**9. Knowledge and practice of Malaria**

**9.1. How is Malaria transmitted?**

a)..... b).....

**9.2. How do you prevent Malaria?**

a)..... b).....

10. Is there any other INGOs / NGOs organization currently working for Malaria diseases in this village or clusters? (Select one) Yes  No

If "Yes", please provide that INGOs / NGOs name- .....

**11. Situational assessment (Tick the appropriate)**

| Ask the following questions |                           | Yes | No |
|-----------------------------|---------------------------|-----|----|
| 11.1.                       | Is this place stable?     |     |    |
| 11.2.                       | Is it a restricted place? |     |    |

**12. Operational coding (Tick the appropriate)**

|                            |  |
|----------------------------|--|
| 12.1. Normal operation     |  |
| 12.2. Restricted operation |  |
| 12.3. Difficult operation  |  |

Remark: Provide a line diagram for this location on the back of the sheet. (For cluster, please include information of a nearby village).

Name of surveyor - ..... Title - ..... Date - .....
